# Supplementary material
Source: publisher figshare collection journal article supplement (https://frontiersin.figshare.com/ndownloader/files/23013392)

## Supplementary data 1

CTD profile of the different stations for all the cruises. Values were averaged every 5 meters.

### A. September 2014

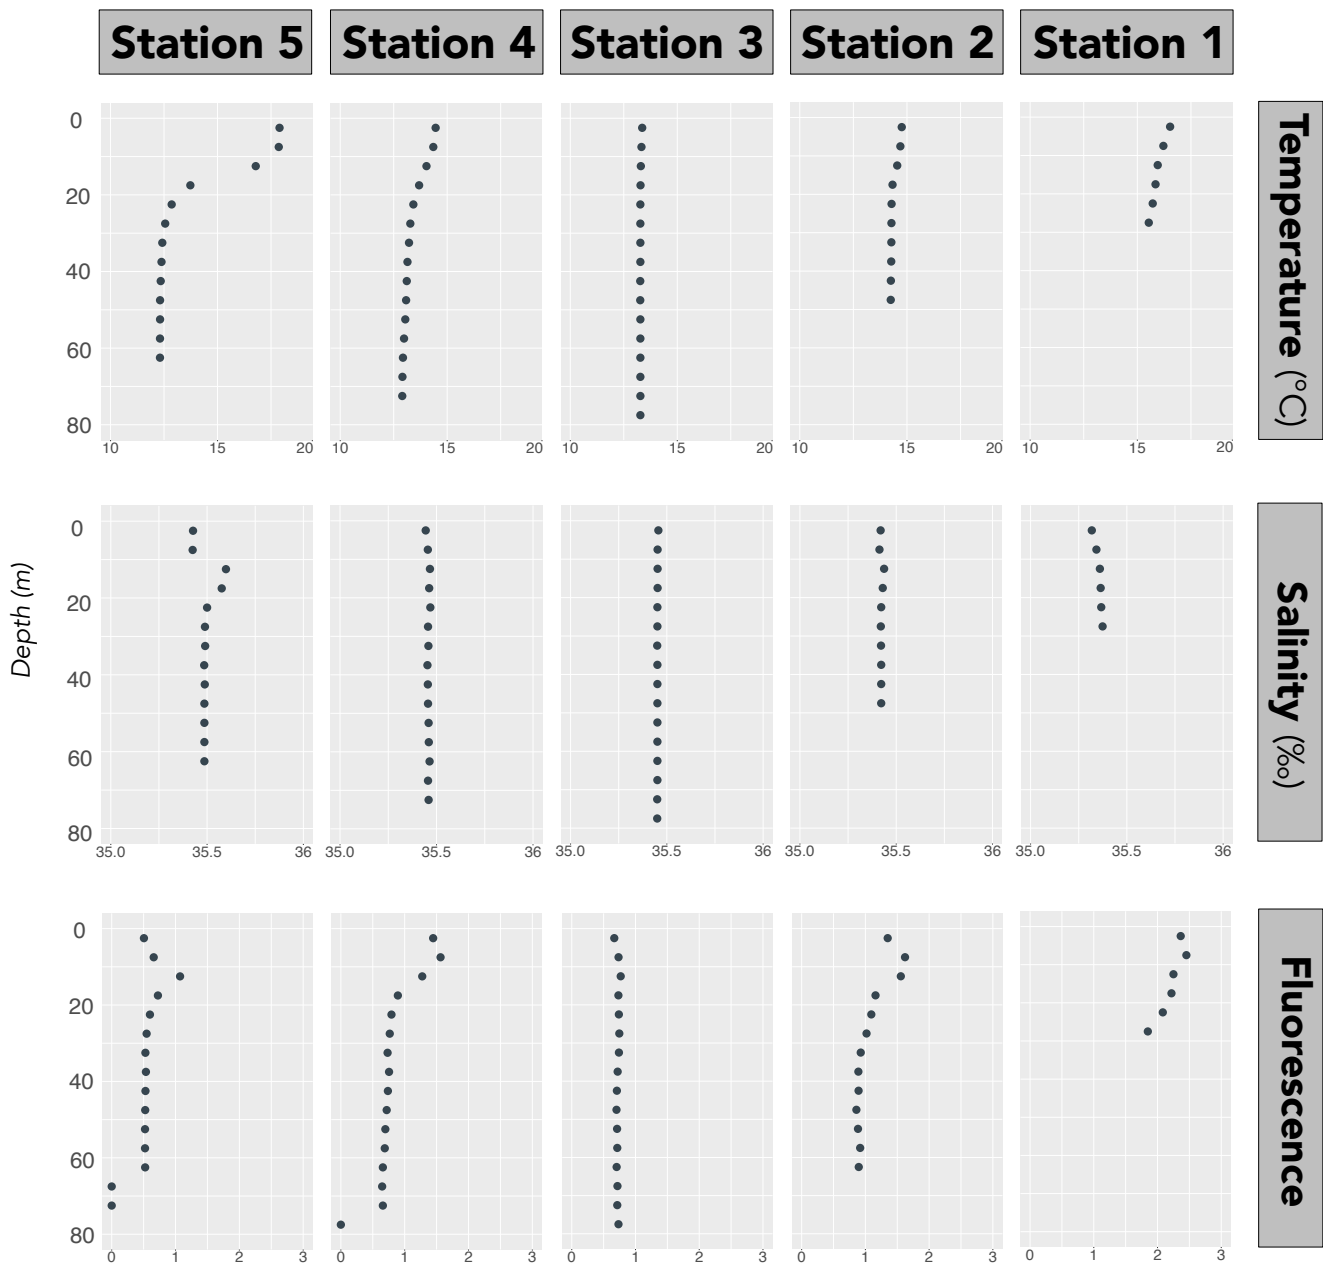

## B. March 2015

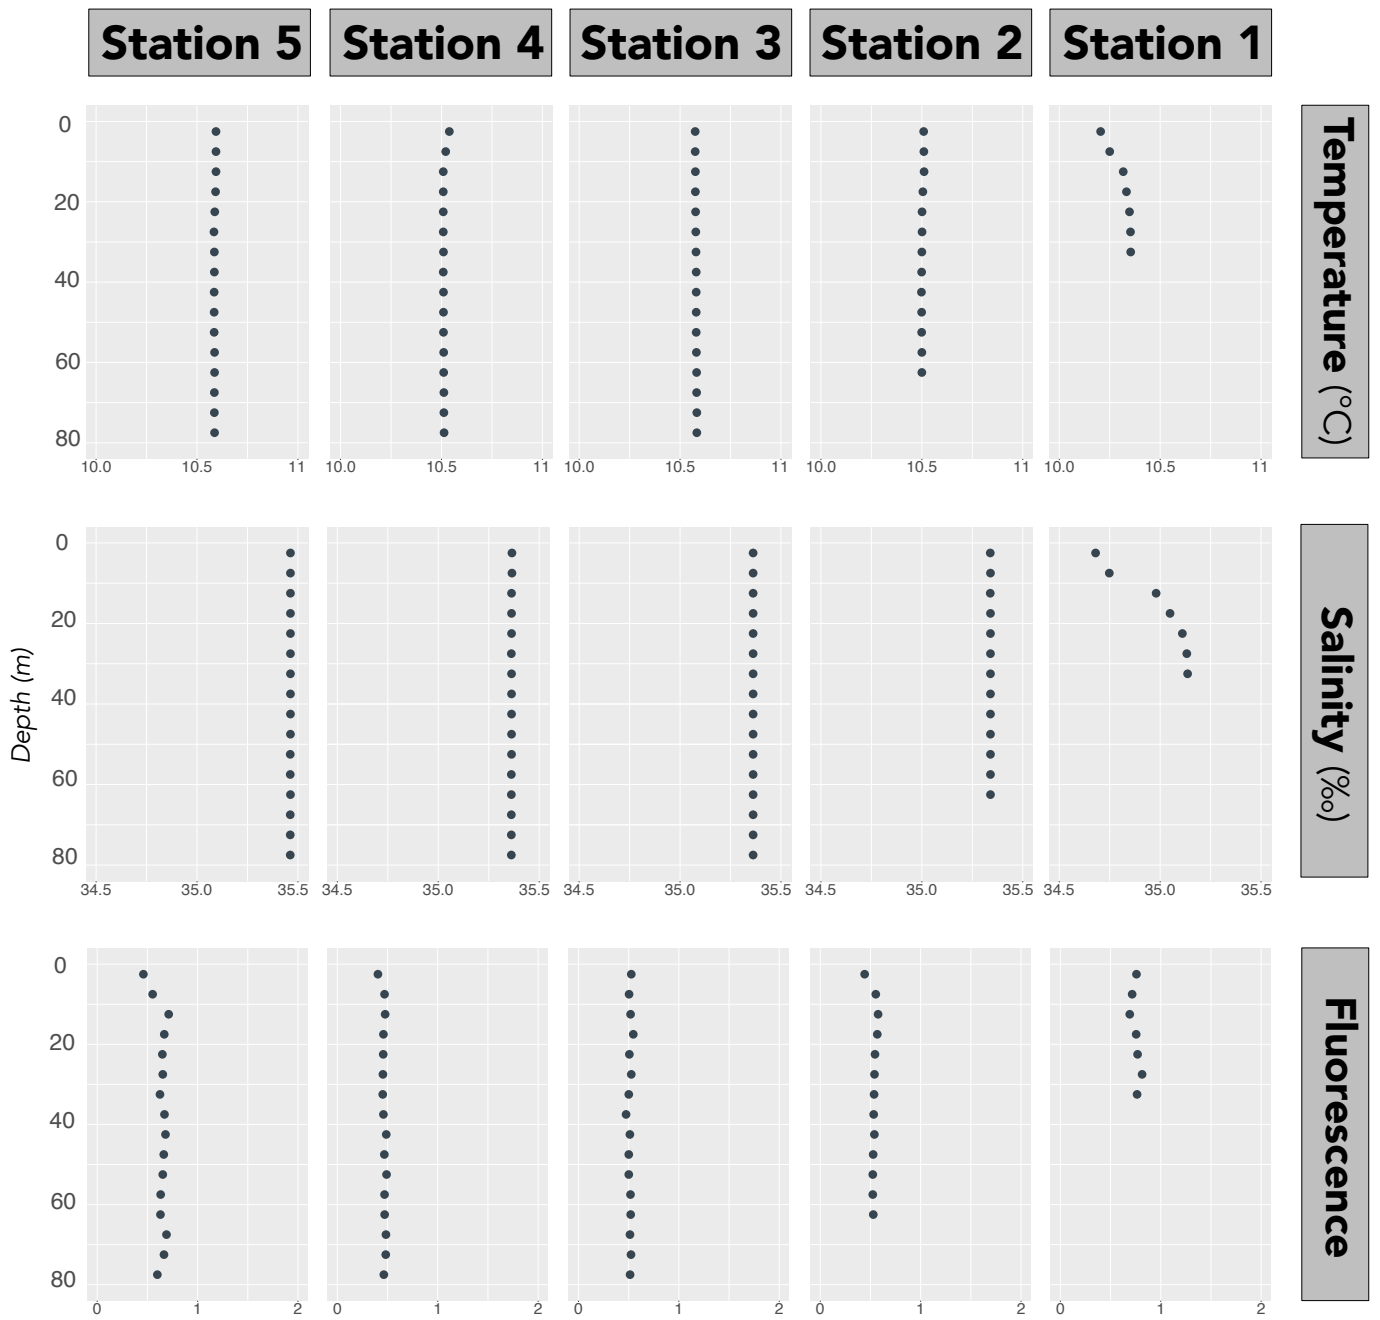

# C. July 2015

**Station 5**

**Station 4**

**Station 3**

**Station 2**

**Station 1**

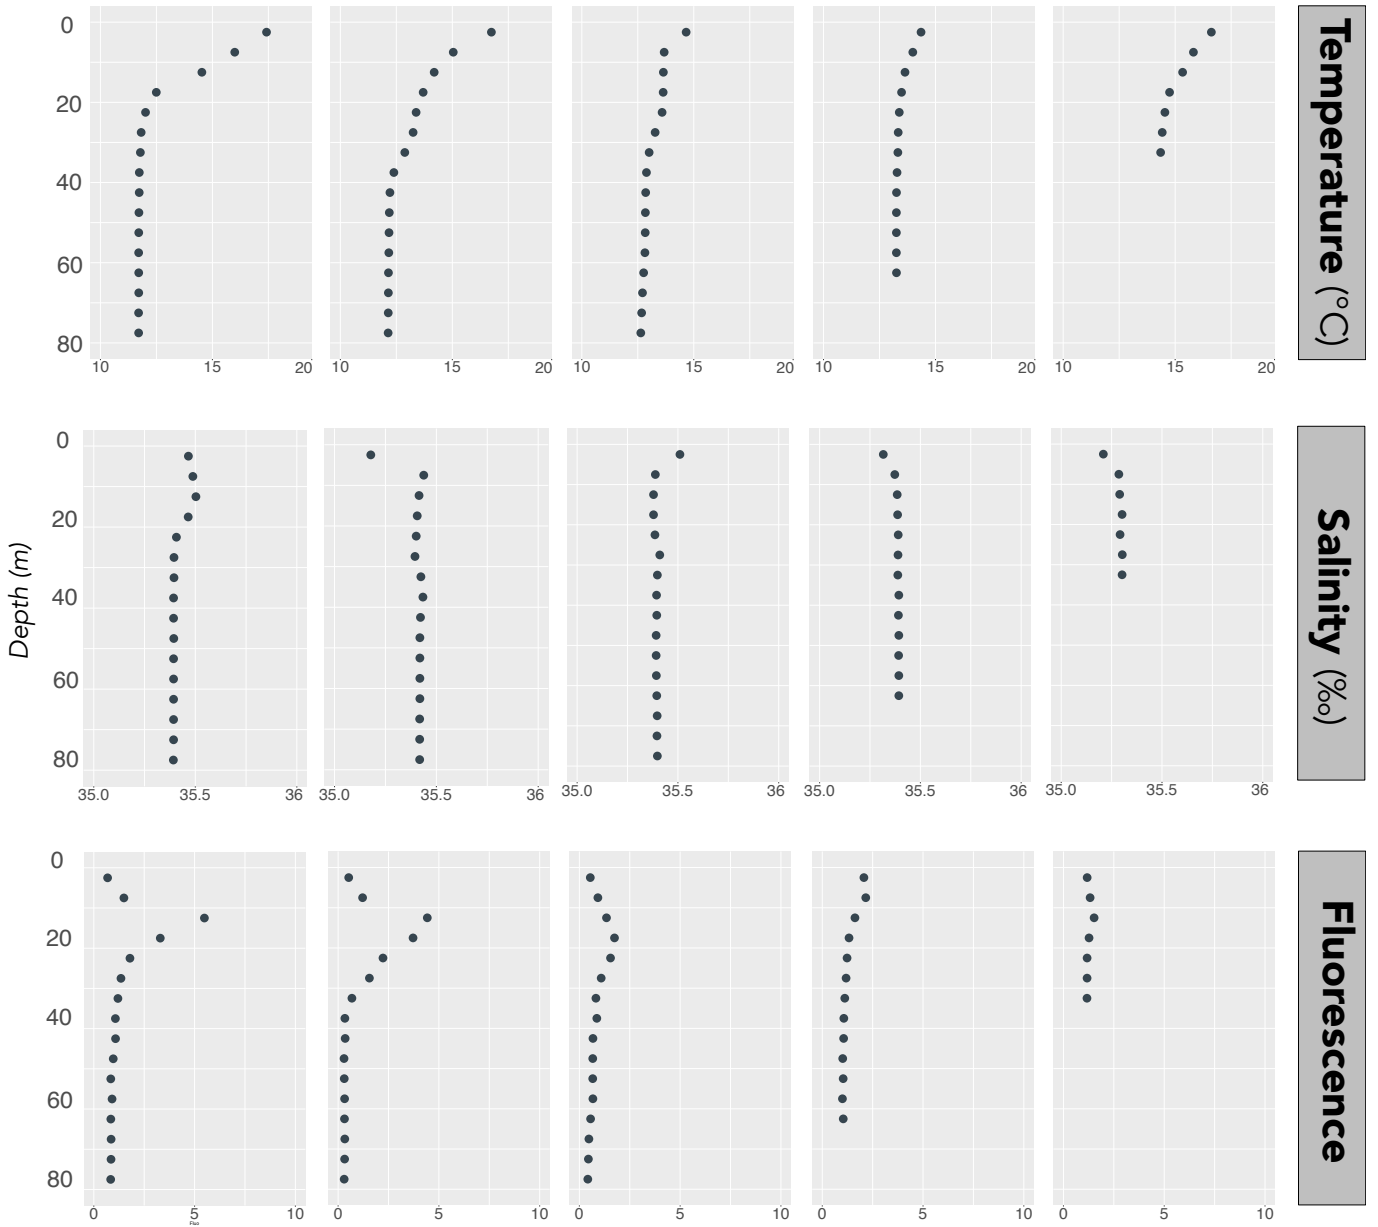

# D. September 2015

**Station 5**

**Station 4**

**Station 3**

**Station 2**

**Station 1**

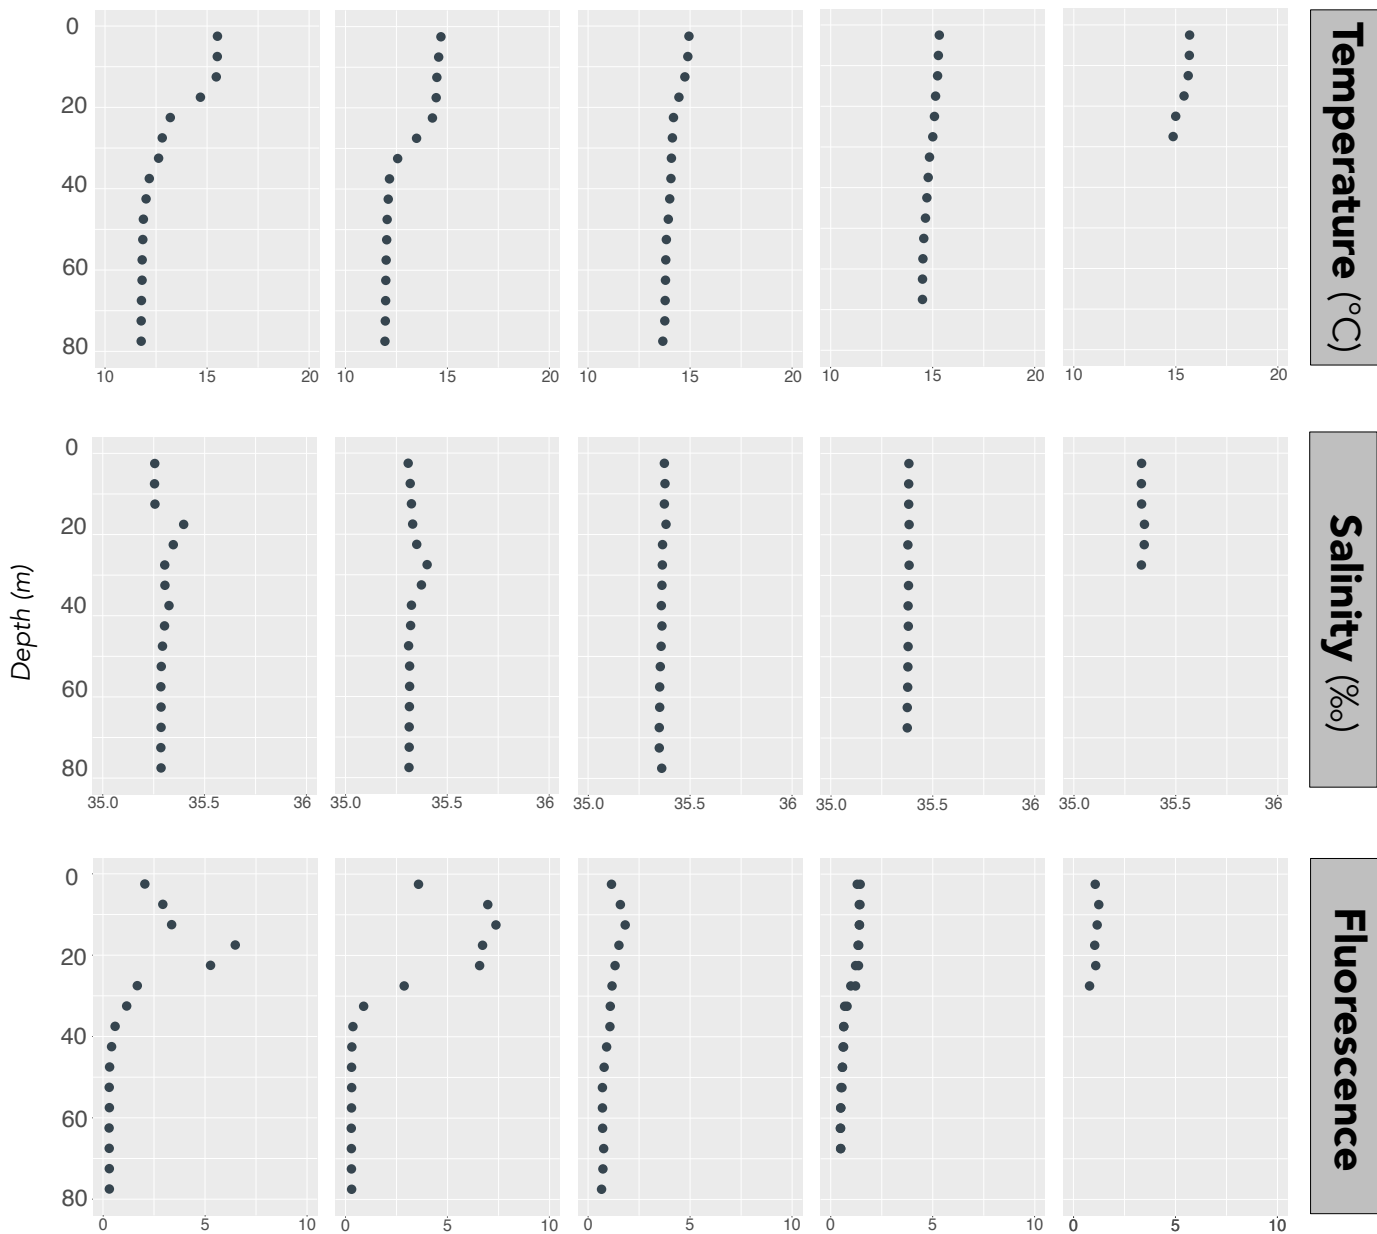

Supplement: Supplementary file 1 [file 23013392]
